# Supplementary material for: Nitrogen-doped graphene network supported copper nanoparticles encapsulated with graphene shells for surface-enhanced Raman scattering
Source: Royal Society of Chemistry journal article supplement (doi:10.1039/c5nr04259c), 2015-01-01
Supplement: c5nr04259c1.pdf [file c5nr04259c1.pdf]

## Supplementary Information

for

### **Nitrogen-Doped Graphene Networks Supported Copper Nanoparticles Encapsulated with Graphene Shells for Surface-Enhanced Raman Scattering**

Xiang Zhang<sup>a</sup>, Chunsheng Shi<sup>a</sup>, Enzuo Liu<sup>a, b</sup>, Jiajun Li<sup>a</sup>, Naiqin Zhao<sup>\*, a, b</sup> and  
Chunnian He<sup>\*, a, b</sup>

<sup>a</sup> *School of Materials Science and Engineering and Tianjin Key Laboratory of  
Composites and Functional Materials, Tianjin University, Tianjin, 300072, P. R.  
China*

<sup>b</sup> *Collaborative Innovation Center of Chemical Science and Engineering, Tianjin  
300072, China*

\* Address correspondence to

cnhe08@tju.edu.cn, nqzhao@tju.edu.cn

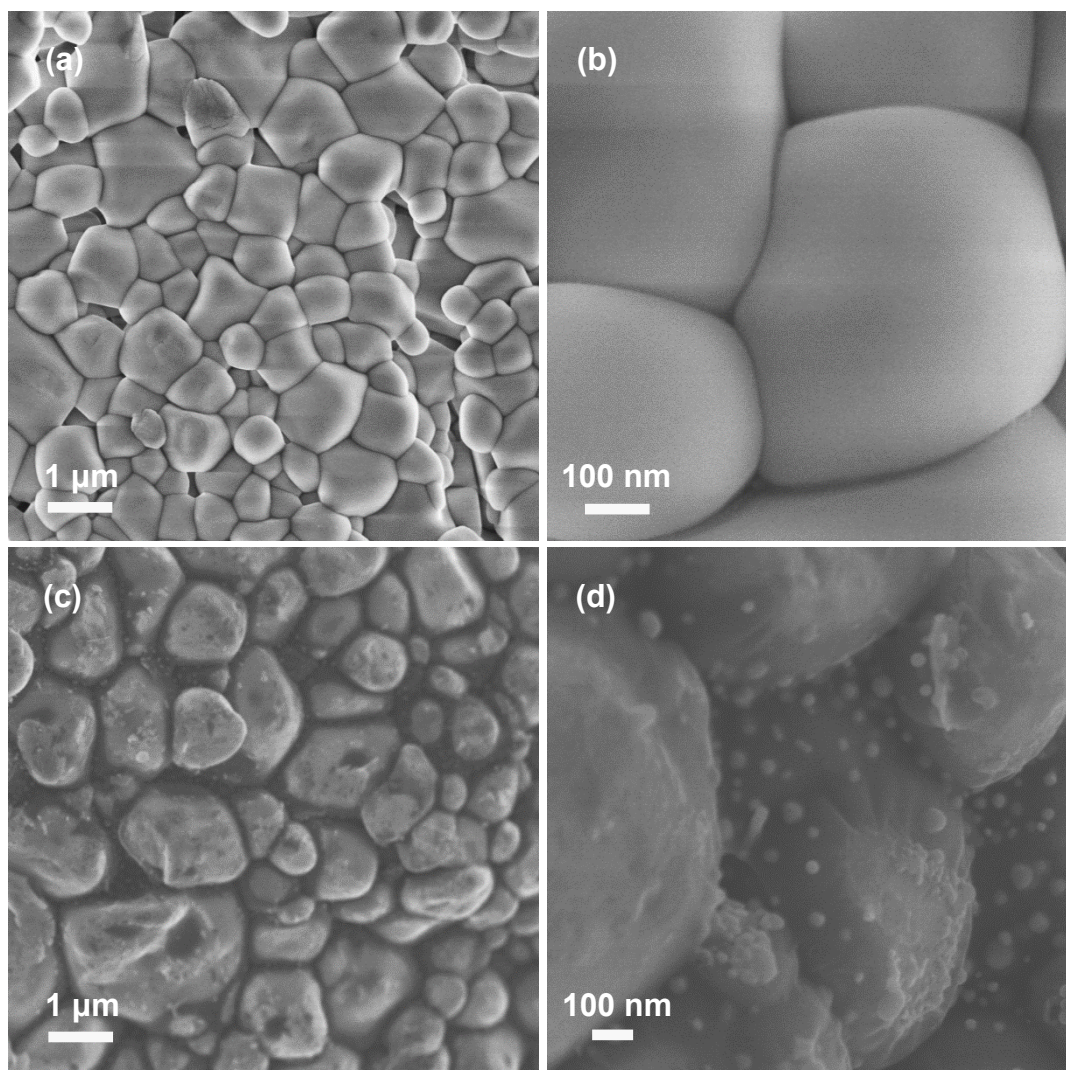

**Fig. S1.** a) and b) SEM images of the precursor powder of  $\text{Cu}(\text{NO}_3)_2\text{-C}_6\text{H}_{12}\text{O}_6/\text{CO}(\text{NH}_2)_2\text{-NaCl}$  after freeze-drying, suggesting that the NaCl particles uniformly coated with a thin film of  $\text{Cu}(\text{NO}_3)_2\text{-C}_6\text{H}_{12}\text{O}_6/\text{CO}(\text{NH}_2)_2$  complex were self-assembled to 3D structure during the freeze-drying process. c) and d) SEM images of the CVD-synthesized Cu@G-NGNs products before eliminating the NaCl, showing that the 3D self-assembly was well preserved after CVD process and the Cu@G-NGNs were formed on the surface of 3D NaCl self-assembly.

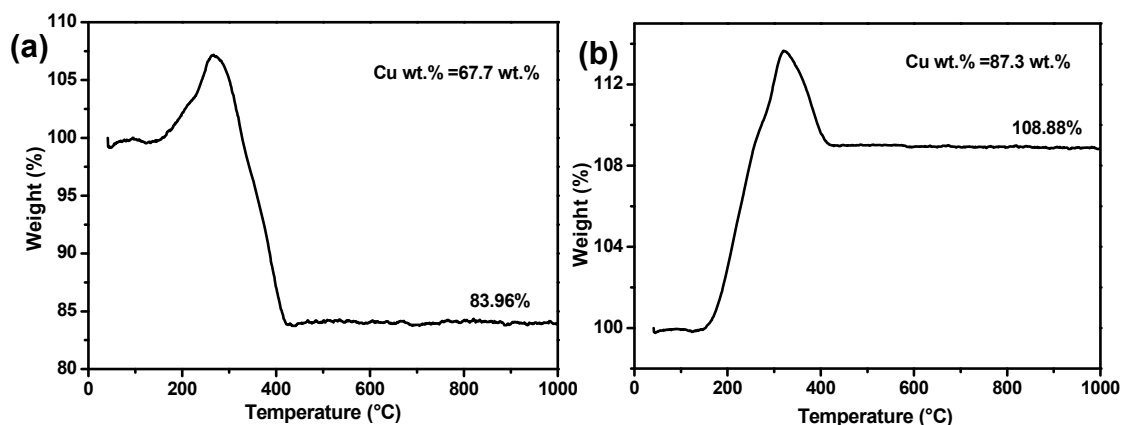

**Fig. S2.** Thermogravimetric analysis of (a) Cu-50 and (b) Cu-240 in air condition. By the same calculation method described in the text, the weight percentage of Cu for Cu-50 and Cu-240 were calculated as 67.7 wt.% and 87.3 wt.%, respectively.

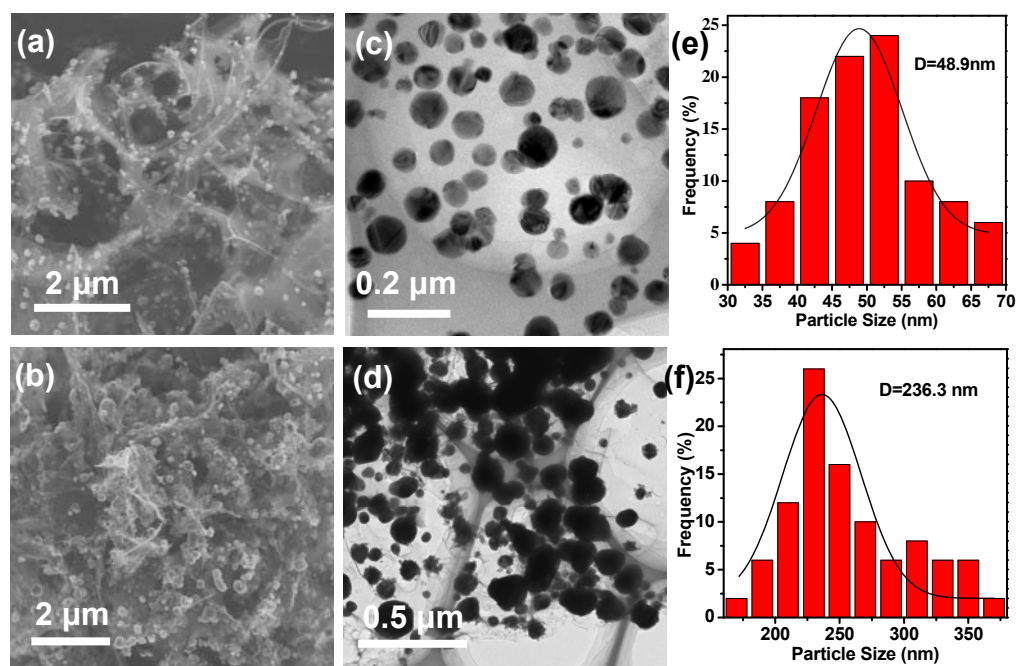

**Fig. S3.** SEM images of the resulting materials' morphology: (a) Cu-50 and (b) Cu-240. TEM images of (c) Cu-50 and (d) Cu-240. (e-f) The corresponding particle size distribution of Fig. S3(c) and (d), respectively (Each calculated from 50 NPs). The average size calculated for the two samples were 48.9 nm (~50 nm) and 236.3 nm (~240 nm).

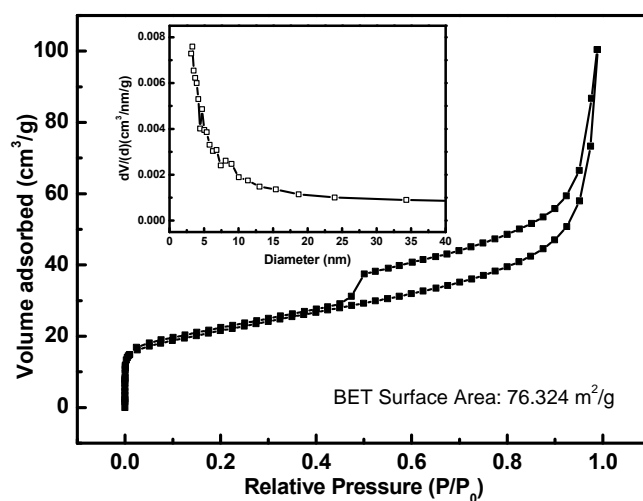

**Fig. S4.** Nitrogen adsorption–desorption isotherms, and inset is pore size distribution curve of Cu@G-NGNs.

**Table S1.** Detailed information of comparison of the BET specific surface area between Cu@G-NGNs and reported metallic SERS substrate as well as rGO/Cu NPs composites.

| Sample Name        | BET Specific Surface Area (m <sup>2</sup> /g) | Metal wt. % | References |
|--------------------|-----------------------------------------------|-------------|------------|
| Cu@G-NGNs          | 76.324                                        | 79.3%       | This work  |
| Cu butterfly wings | 56.6                                          | 100%        | S1         |
| Ag sponges         | 39                                            | 100%        | S2         |
| Ag hollow spheres  | 30.9                                          | 100%        | S3         |
| Au–Pd foams        | 20.19                                         | 100%        | S4         |
| rGO/Cu NPs         | 29.96                                         | >63%        | S5         |

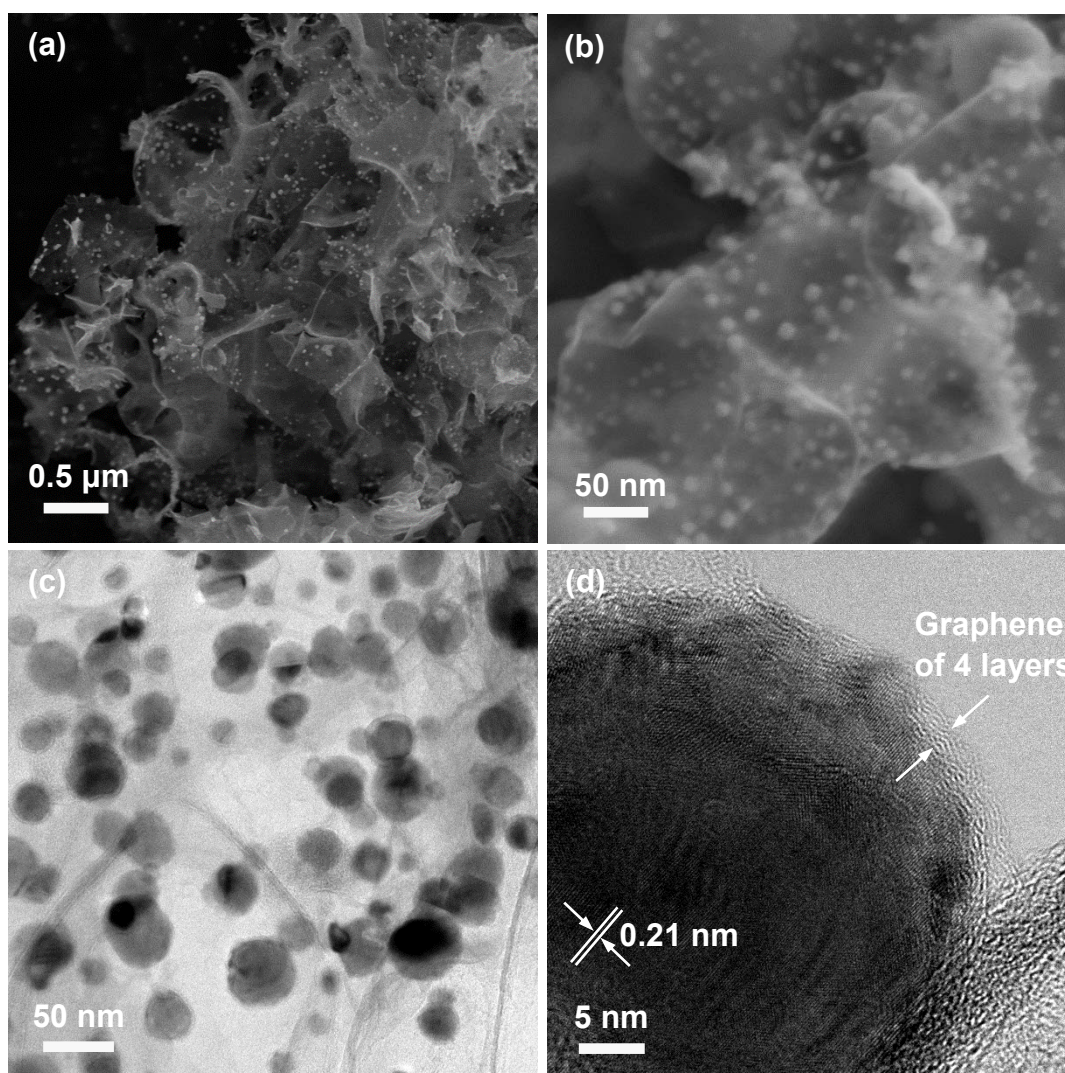

**Fig. S5.** a) and b) SEM, c) and d) HRTEM images of the Cu@G-GNs, showing a similar morphology with Cu@G-NGNs. The graphene walls were homogenously decorated with Cu NPs (5-30 nm).



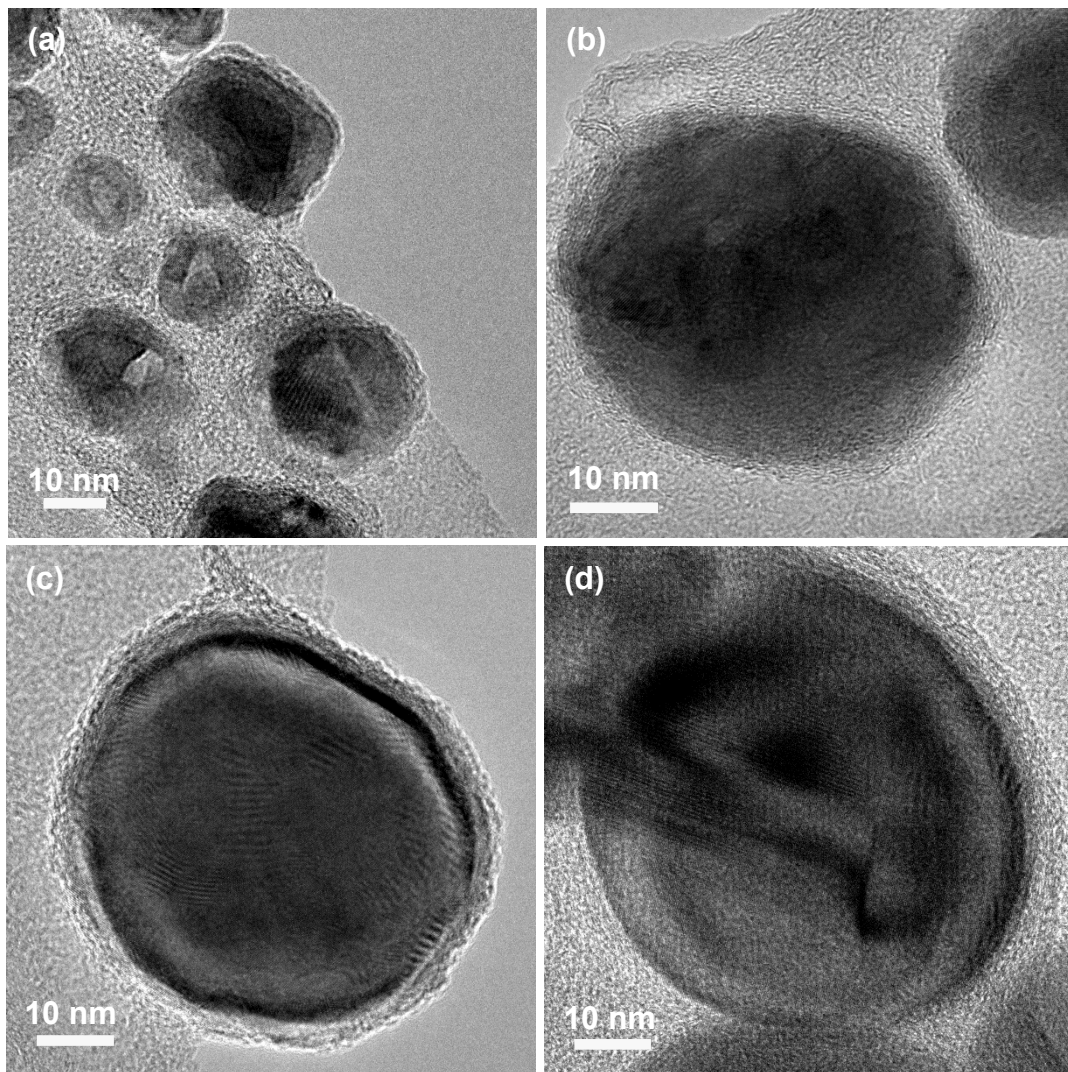

**Fig. S6.** HRTEM images of Cu@G nanoparticles, showing that Cu nanoparticle is entirely encapsulated by thin graphene shells ( $\sim 1$  nm) tightly anchored on the graphene walls from the 3D network.

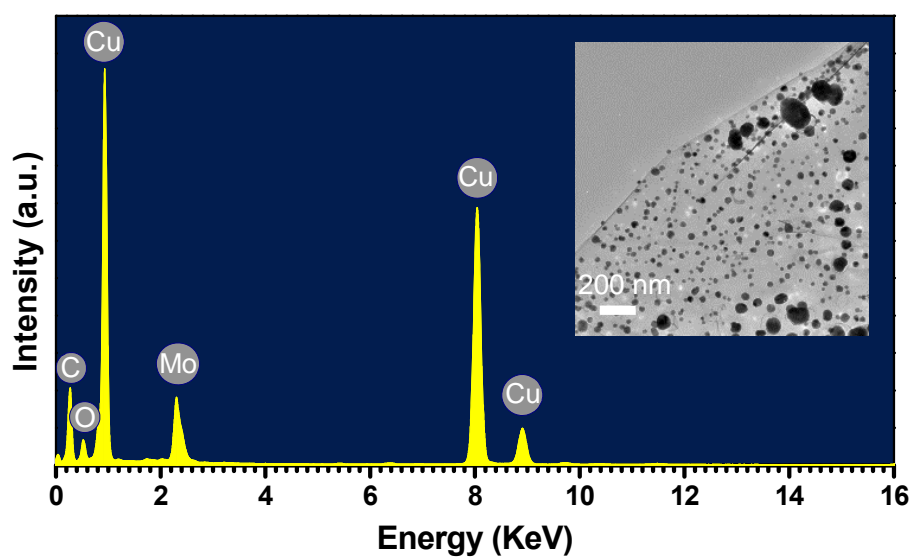

**Fig. S7.** EDS pattern and corresponding TEM image (inset) of Cu@G-NGNs.

The EDS sample was prepared using Cu@G-NGNs powder dispersed in ethanol followed by short-time ultrasonification. A small drop of this dispersion was placed on a carbon coated Mo grid, dried under ambient conditions.

**Table S2.** The detailed element contents of EDS analysis in Fig. S7.

| Element | Weight Ratio (%) | Atomic Ratio (%) |
|---------|------------------|------------------|
| C K     | 16.23            | 47.48            |
| O K     | 3.77             | 8.28             |
| Cu K    | 80.00            | 44.23            |

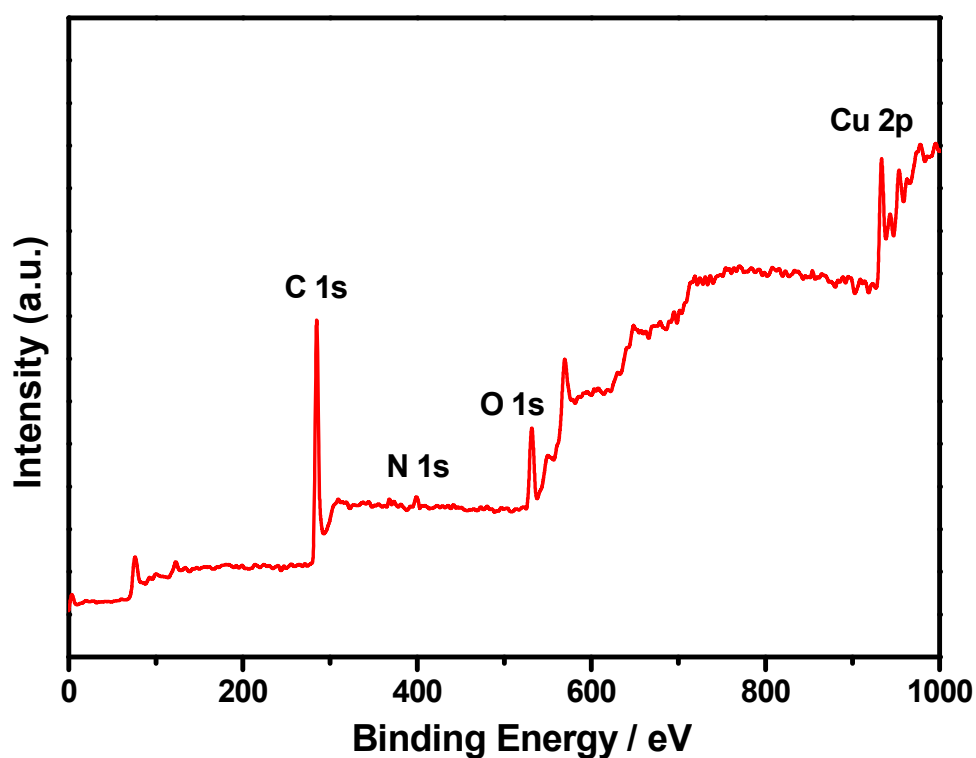

**Fig. S8.** The XPS full spectrum of Cu@G-NGNs.

**Table S3.** The relative element ratio of XPS analysis in Fig.S8.

| Element                   | C1s              | N1s    | O1s              | Cu2p3  |
|---------------------------|------------------|--------|------------------|--------|
| Relative Atomic Ratio (%) | 81.97            | 0.92   | 13.41            | 3.7    |
| Binding Energy (eV)       | 284.32<br>288.58 | 399.42 | 529.61<br>531.91 | 932.35 |

The relative content of N element (At%) doped in graphene was calculated by the following equation:

$$At\% = \frac{A_{N1s}}{A_{C1s} + A_{N1s}} \times 100\% = 0.92 / (81.97 + 0.92) * 100\% = 1.10\%.$$



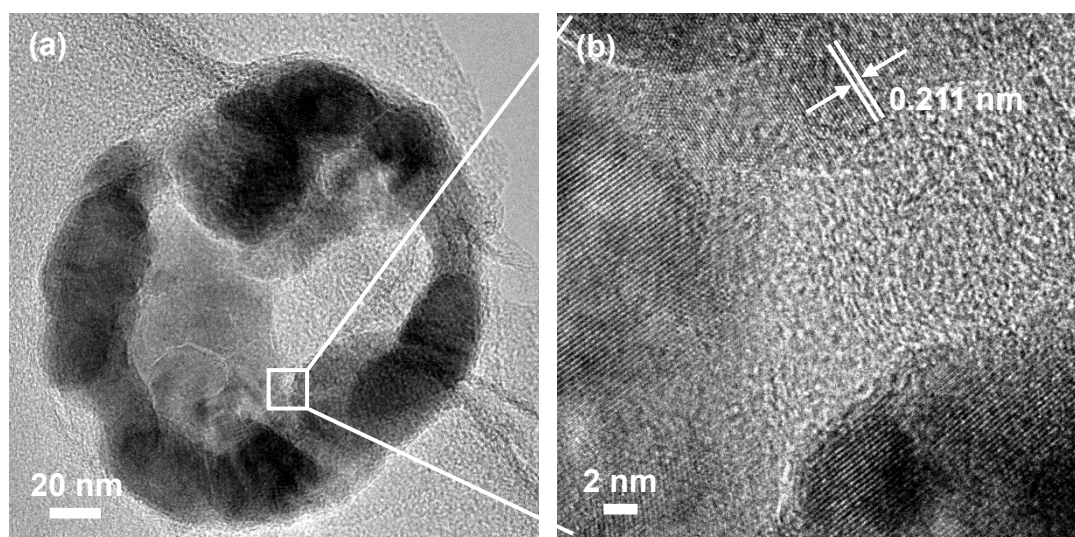

**Fig. S9.** HRTEM images of the aggregation and interdiffusion of the  $\text{Cu}_n/\text{C}$  nanoclusters. b) is the magnified TEM image of the selected area in a).

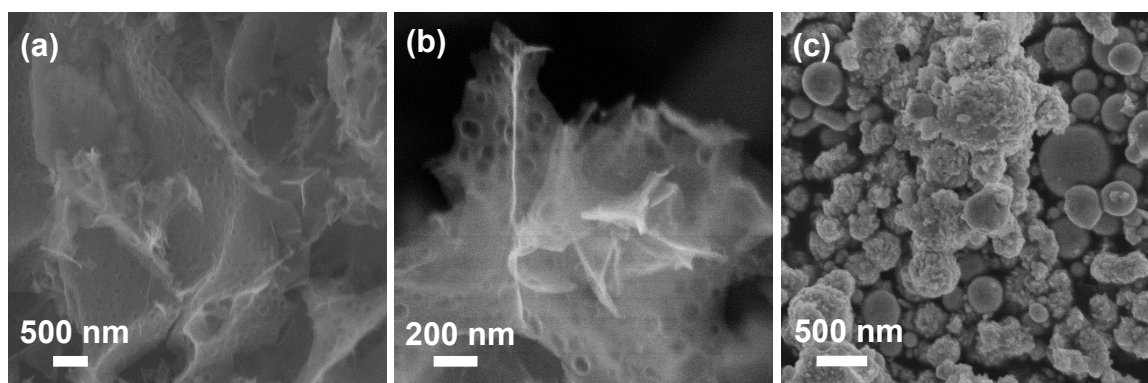

**Fig. S10.** a) and b) SEM images of NGNs obtained by etching Cu NPs from the  $\text{Cu}@G\text{-NGNs}$  composites. c) SEM images of commercial Cu NPs with average size of 50 nm.

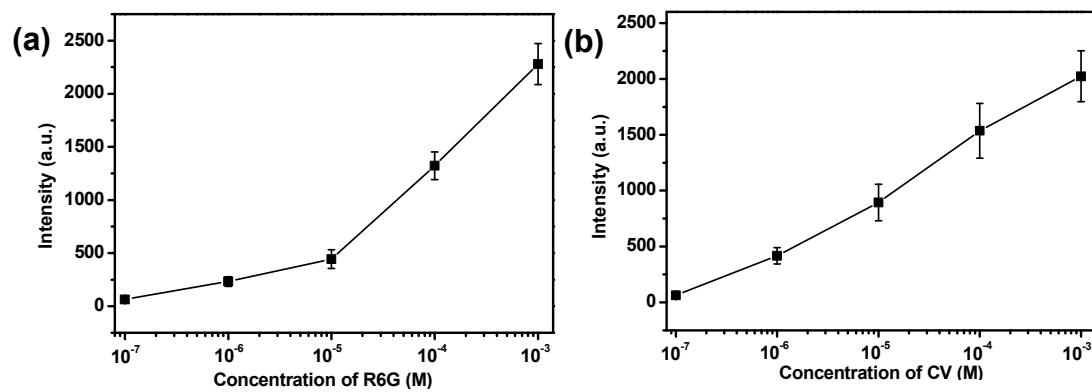

**Fig. S11.** (a) The intensity of SERS signal versus the concentration of (a) R6G at  $612\text{ cm}^{-1}$ , and (b) CV at  $1170\text{ cm}^{-1}$  for Cu@G-NGNs (Cu-20) substrate. 5 spectra of different spots were used to calculate the intensity for each concentration.

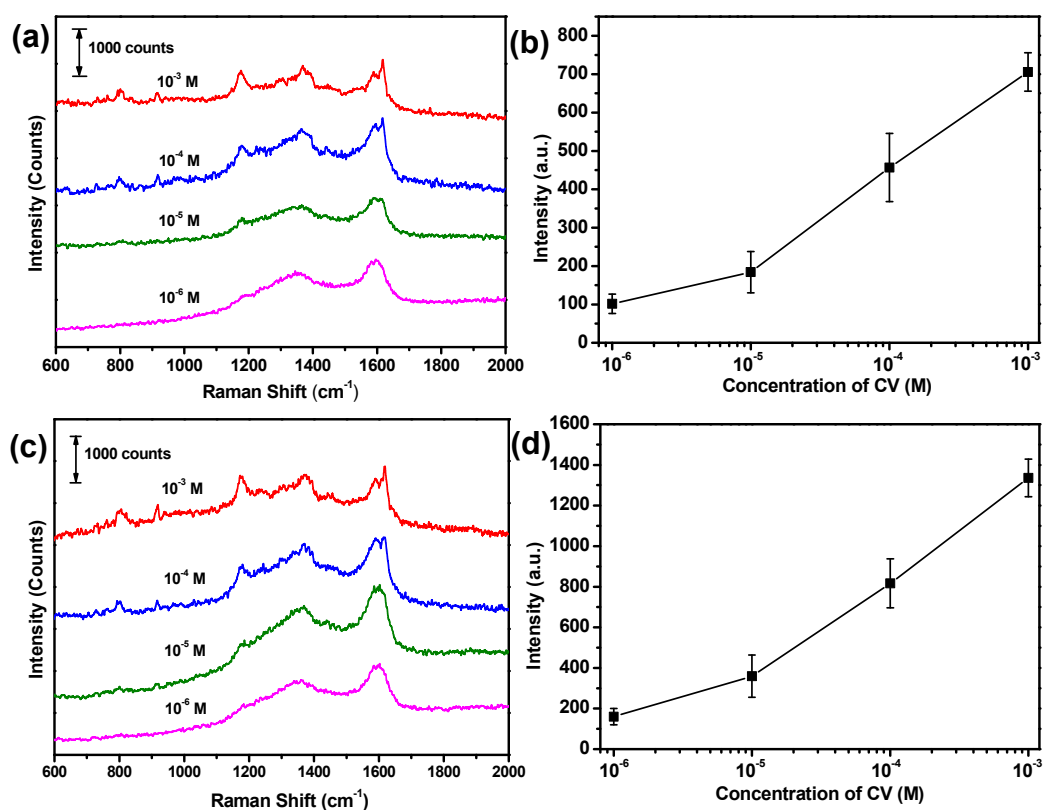

**Fig. S12.** SERS spectra of CV at different concentrations adsorbed on (a) Cu-50 and (c) Cu-240 substrate. The corresponding intensity of SERS signal versus the concentration of CV at  $1170\text{ cm}^{-1}$  for (b) Cu-50 and (d) Cu-240 substrate, respectively. 5 spectra of different spots were used to calculate the intensity for each concentration.

### Detailed calculation of enhancement factor

The SERS enhancement factors (EF) for R6G can be calculated according to the equation

$$EF = \frac{I_{SERS} \times N_{bulk}}{I_{bulk} \times N_{SERS}}$$

Where  $I_{SERS}$  and  $I_{bulk}$  are the integrated intensities of R6G molecules adsorbed on the Cu@G-NGNs substrate and from  $10^{-2}$  M of R6G bulk solution, respectively.  $N_{SERS}$  and  $N_{bulk}$  are the corresponding numbers of R6G molecules adsorbed on the Cu@G-NGNs substrate and in the bulk solution in the focal volume of the laser beam, respectively.

For valuable determination of  $N_{bulk}$  and  $N_{SERS}$ , 5  $\mu$ L R6G solution of  $10^{-2}$  M and  $10^{-5}$  M were carefully dropped on glass and Cu@G-NGNs substrates, respectively.

$$N_{bulk} = Ahc_{bulk} N_A$$

Where  $A$  is the area of the laser focal spot (diameter of 1  $\mu$ m),  $h$  is the confocal depth of the laser (15  $\mu$ m), which is calculated by a modified equation in a similar

method:<sup>S6</sup> 
$$h = \int_0^{\infty} I(z) dz / I_0$$

Where  $I(z)$  is the intensity of the Raman peak of glass ( $1093 \text{ cm}^{-1}$ ), which is measured as a reference to calculate  $h$ . Considering the transparent feature of glass substrate, it is meaningless to calculate the intensity below the focal plane of glass substrate in Fig. S13. So the measured  $h$  is an underestimated result.

$c_{bulk}$  is the concentration of R6G bulk solution, here  $c_{bulk} = 10^{-2}$  M, and  $N_A$  is the Avogadro constant.

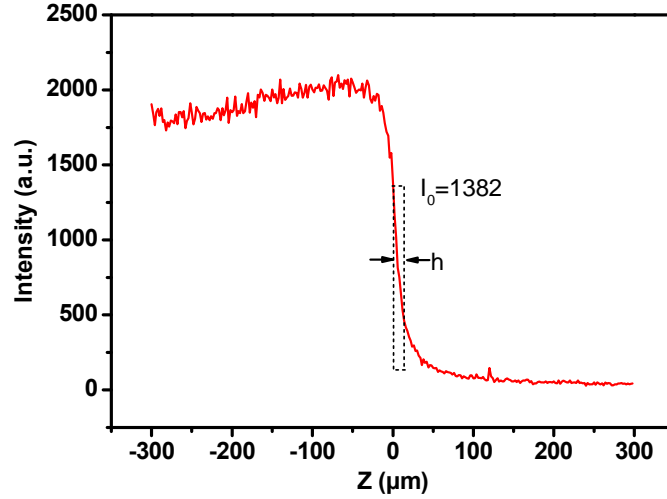

**Fig. S13.** Raman intensity-depth profile of the intensity of  $1093\text{ cm}^{-1}$  band for a glass slide substrate.

Provided that R6G molecules were in monolayer adsorption on the Cu@G-NGNs SERS substrate:

$$N_{SERS} = \frac{c_{SERS} \nu N_A A}{\pi r^2}$$

$$N_{bulk} / N_{SERS} = \frac{\pi r^2 h c_{bulk}}{\nu c_{SERS}} = [3.14 \times (4.0 \times 10^{-3})^2 \times (15 \times 10^{-6}) \times (1 \times 10^{-2})] / [(5 \times 10^{-9}) \times (1.0 \times 10^{-5})] =$$

150.72

Where  $c_{SERS}$  is the concentration of R6G solution for SERS,  $c_{SERS} = 10^{-5}\text{ M}$ ,  $\nu = 5\text{ }\mu\text{L}$ ,  $r$  is the radius of  $5\text{ }\mu\text{L}$  R6G solution formed on the SERS substrate,  $r = 4.0\text{ mm}$ .

Fig. S14 (a) and (b) are the normal Raman spectrum of  $10^{-2}\text{ M}$  of R6G solution and SERS spectrum of  $10^{-5}\text{ M}$  of R6G solution acquired from the Cu@G-NGNs substrate. The integrated intensities of the bands for  $I_{bulk}$  ( $612\text{ cm}^{-1}$ ) and  $I_{SERS}$  ( $610\text{ cm}^{-1}$ ) were 1067 and 8122 cps, respectively. Considering the different number of molecules in each unit volume for normal Raman spectrum on glass substrate and SERS spectrum on the Cu@G-NGNs substrate,<sup>S7</sup>  $I_{SERS} / I_{bulk} = 8122 \times 10^3 / 1067$ .

Finally, the EF of the Cu@G-NGNs substrate was calculated as  $1.15 \times 10^6$ , which is an underestimated result.

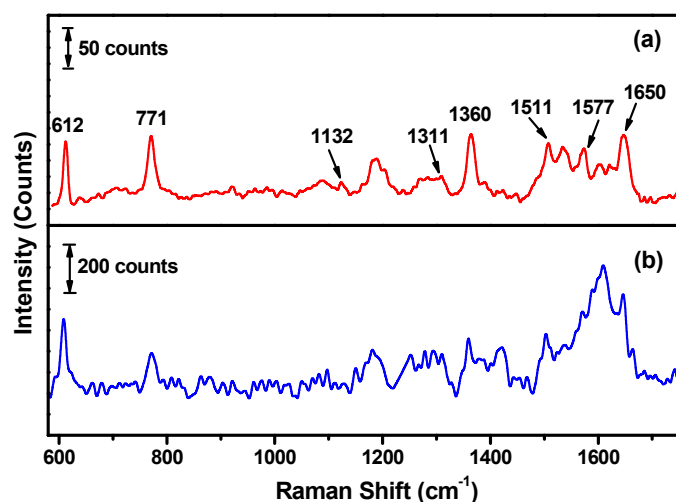

**Fig. S14.** (a) Normal Raman spectrum of  $10^{-2}$  M R6G solution. Laser power: 0.5 mW. (b) SERS spectrum of  $10^{-5}$  M R6G solution acquired from the Cu@G-NGNs substrate. Laser power: 0.5 mW. Baselines of both spectra were removed for the comparison.

#### References:

- S1 Y. Tan, J. Gu, W. Xu, Z. Chen, D. Liu, Q. Liu, D. Zhang, *ACS Appl. Mater. & Interf.*, 2013, **5**, 9878-9882.
- S2 S. Tang, S. Vongehr, Y. Wang, J. Cui, X. Wang, X. Meng, *J. Mater. Chem. A*, 2014, **2**, 3648-3660.
- S3 Y. Wang, T. Gao, K. Wang, X. Wu, X. Shi, Y. Liu, S. Lou, S. Zhou, *Nanoscale*, 2012, **4**, 7121-7126.
- S4 H. Liu, Q. Yang, *J. Mater. Chem.*, 2011, **21**, 11961-11967.
- S5 A. Ehsani, B. Jaleh, M. Nasrollahzadeh, *J. Power Sources*, 2014, **257**, 300-307.
- S6 W. Cai, B. ren, X. Li, C. She, F. Liu, X. Cai, Z. Tian, *Surf. Sci.*, 1998, **406**, 9-22.
- S7 J. Chen, B. Shen, G. Qin, X. Hu, L. Qian, Z. Wang, S. Li, Y. Ren, L. Zuo, *J. Phys. Chem. C*, 2012, **116**, 3320-3328.
